# Supplementary figures and images for: The novel HSP90 monoclonal antibody 9B8 ameliorates articular cartilage degeneration by inhibiting glycolysis via the HIF-1 signaling pathway
Source: PubMed Central journal article supplement — Heliyon. 2024 Aug 8;10(16):e35603. doi: 10.1016/j.heliyon.2024.e35603 (PMC11369415; doi:10.1016/j.heliyon.2024.e35603), 2024-08-08

**Supplementary Figure 1**

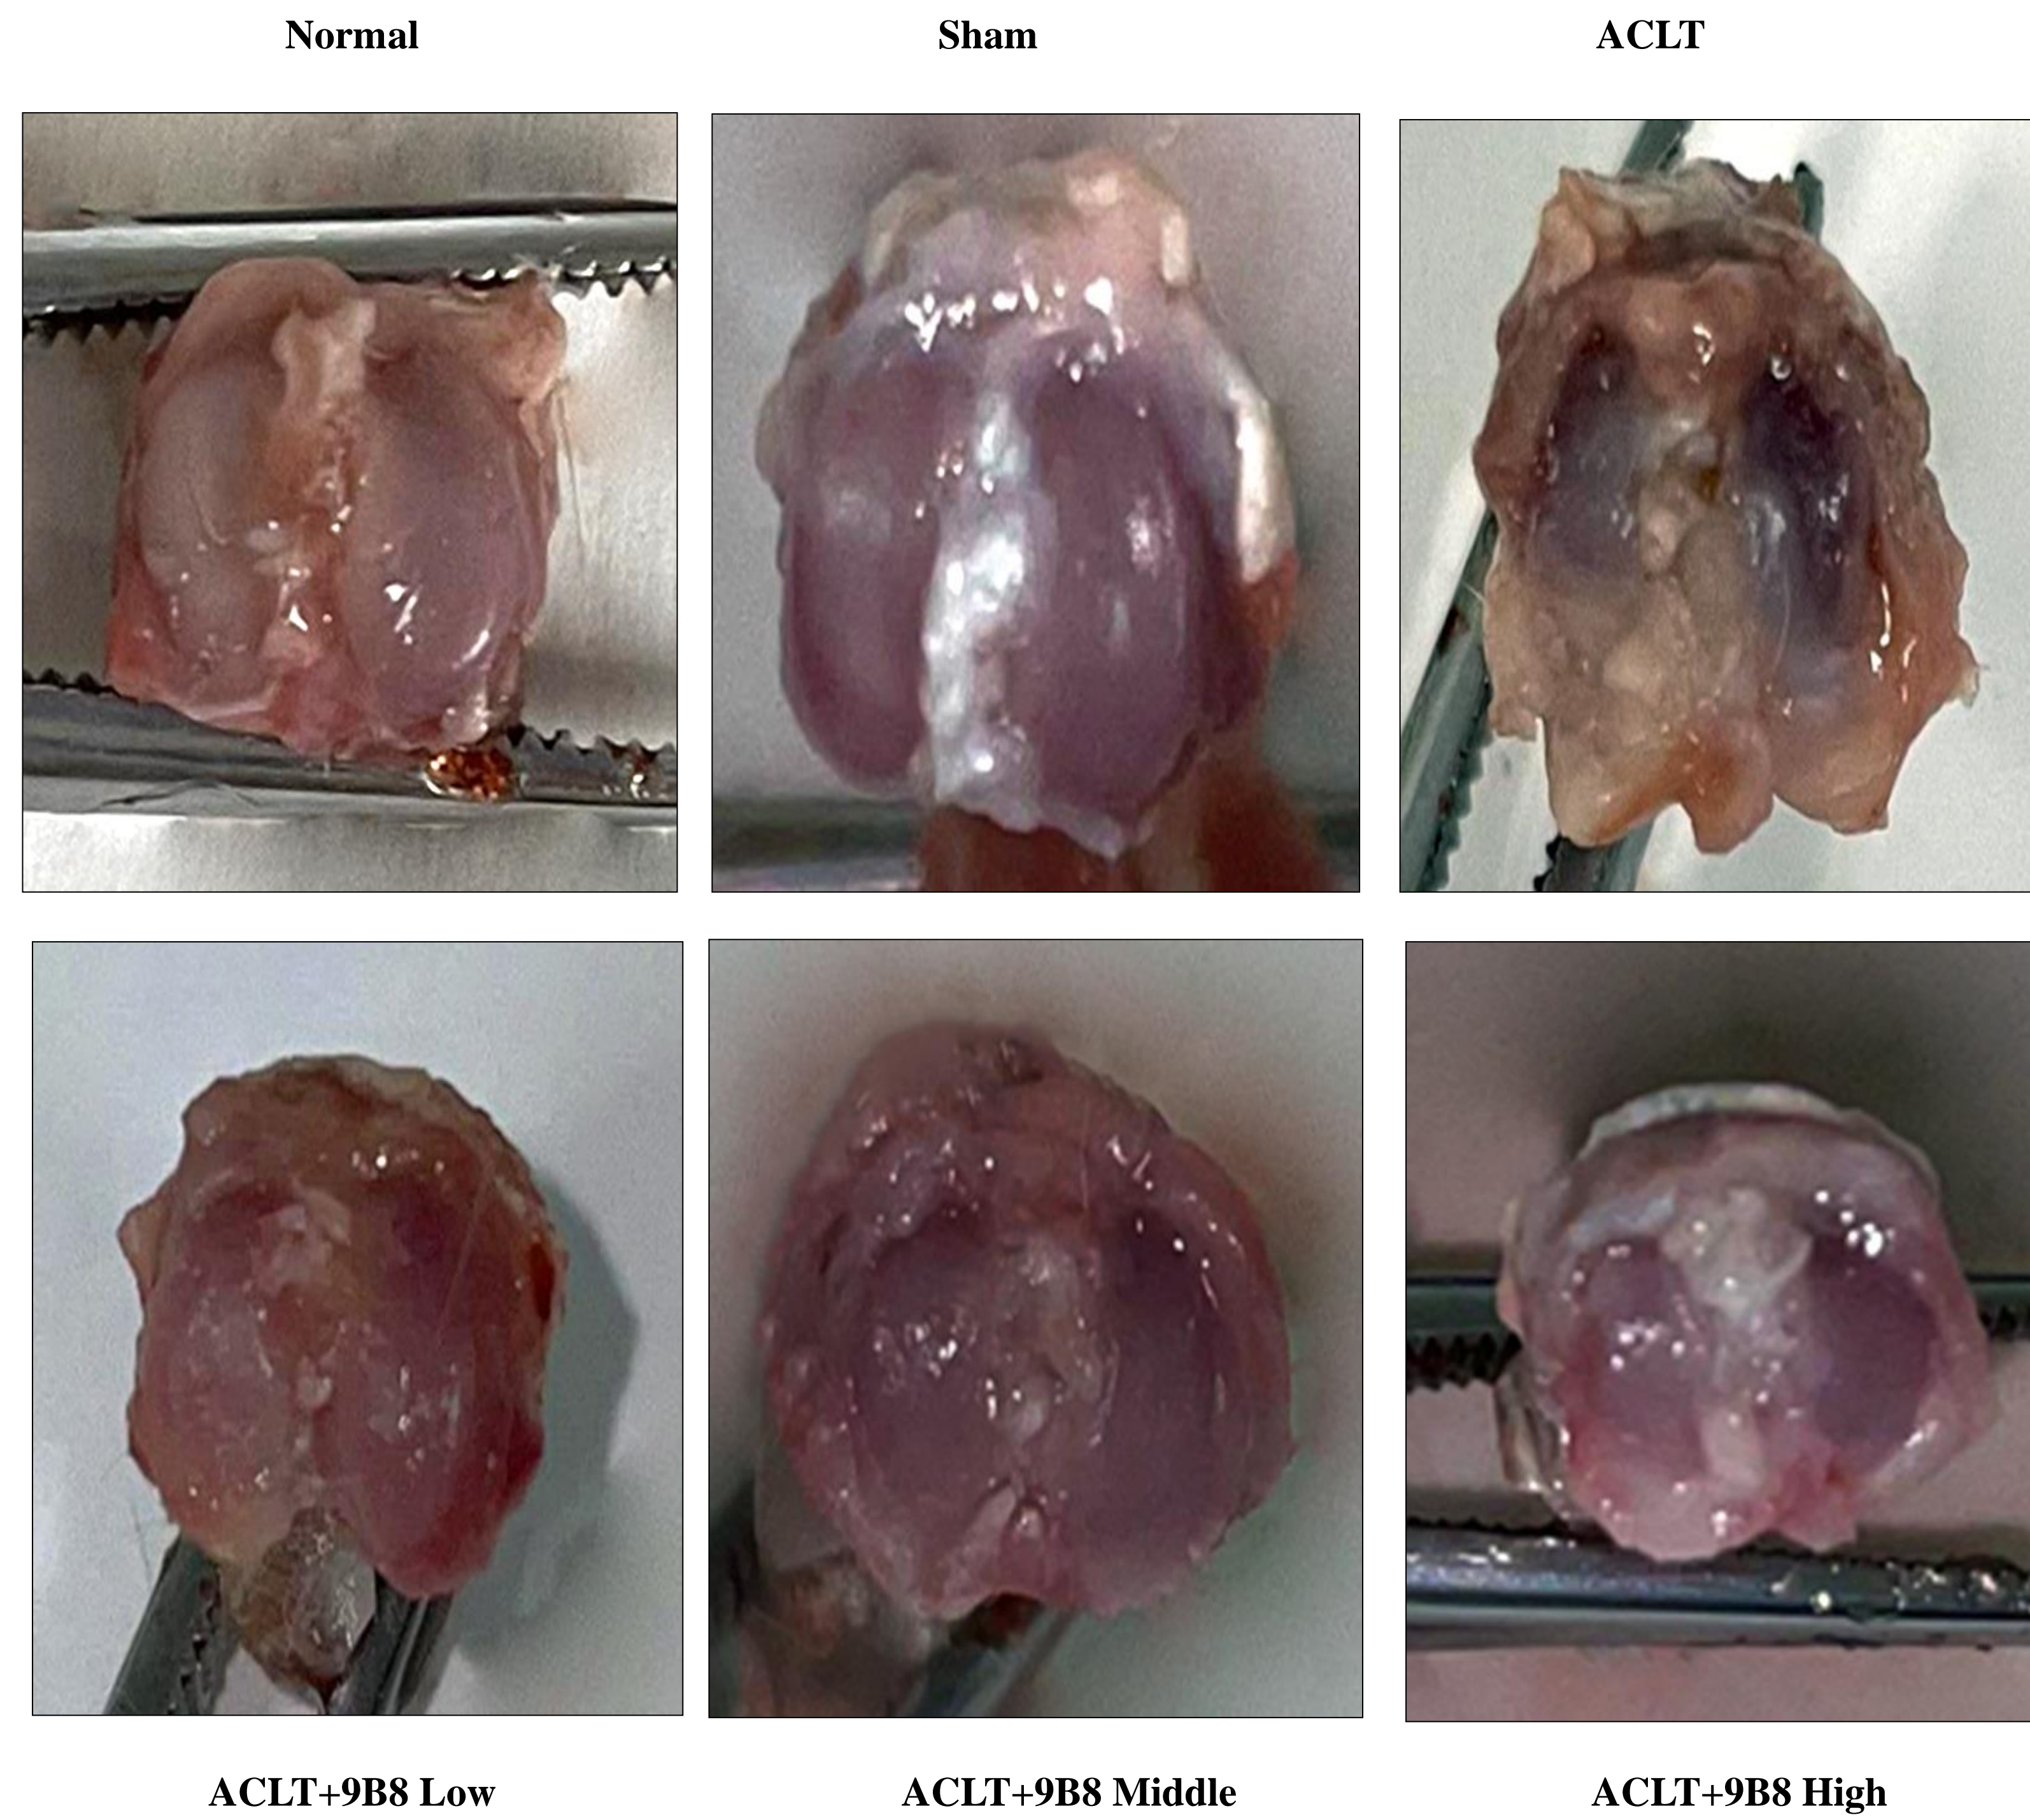

Supplement: mmc1.pdf [file mmc1.pdf]
